# Supplementary material for: Electrospun PAN + CALF-20 fibers: characterization and removal of Pb( ii ) and Cu( ii ) ions from aqueous solution
Source: Royal Society of Chemistry journal article supplement (doi:10.1039/d5ra09555g), 2026-01-01
Supplement: d5ra09555g1.pdf [file d5ra09555g1.pdf]

## ***Supplementary Material:*** Preparation of electrospun PAN+CALF-20 fibers: characterization and adsorption study of Pb(II) and Cu(II) ions from aqueous solution

Guilherme H. F. Melo<sup>1\*</sup>, Yuxin Liu<sup>1</sup>, Jinfeng Zhang<sup>1</sup>, Nicholas Fylstra<sup>2</sup>, George Shimizu<sup>2</sup>, Uttandaraman Sundararaj<sup>1\*</sup>

1 - Department of Chemical and Petroleum Engineering, University of Calgary, Calgary, Canada

2 - Department of Chemistry, University of Calgary, Calgary, Canada

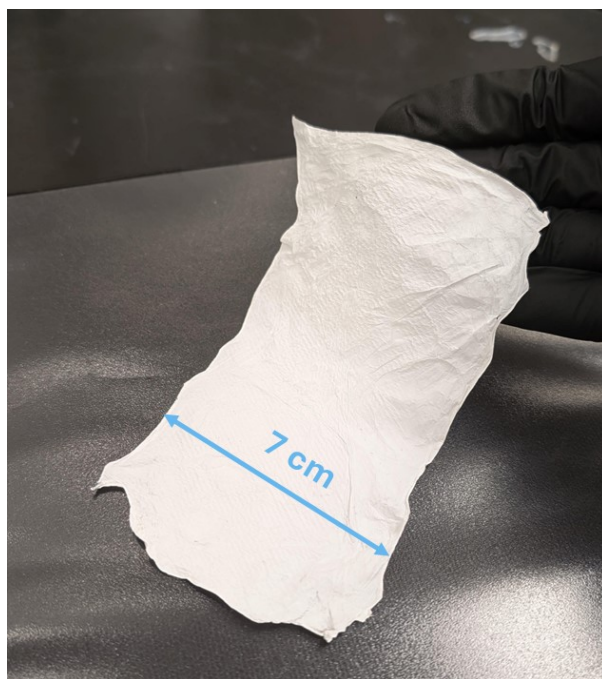

**Fig. S1** Digital image of as-spun PAN membrane containing 60 wt.% CALF-20.

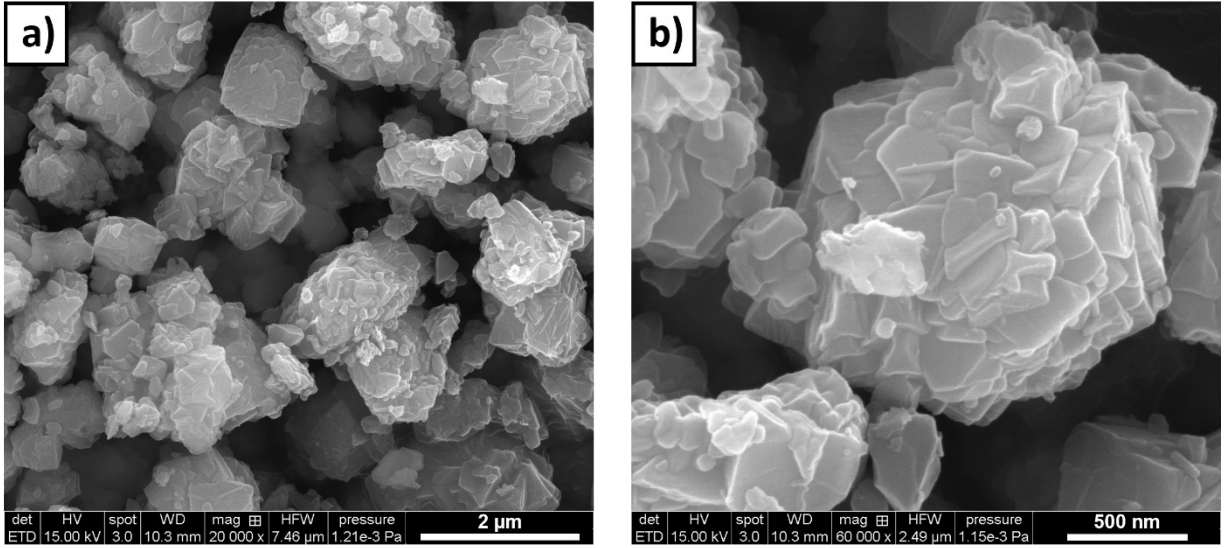

**Fig. S2** SEM images of CALF-20 particles.

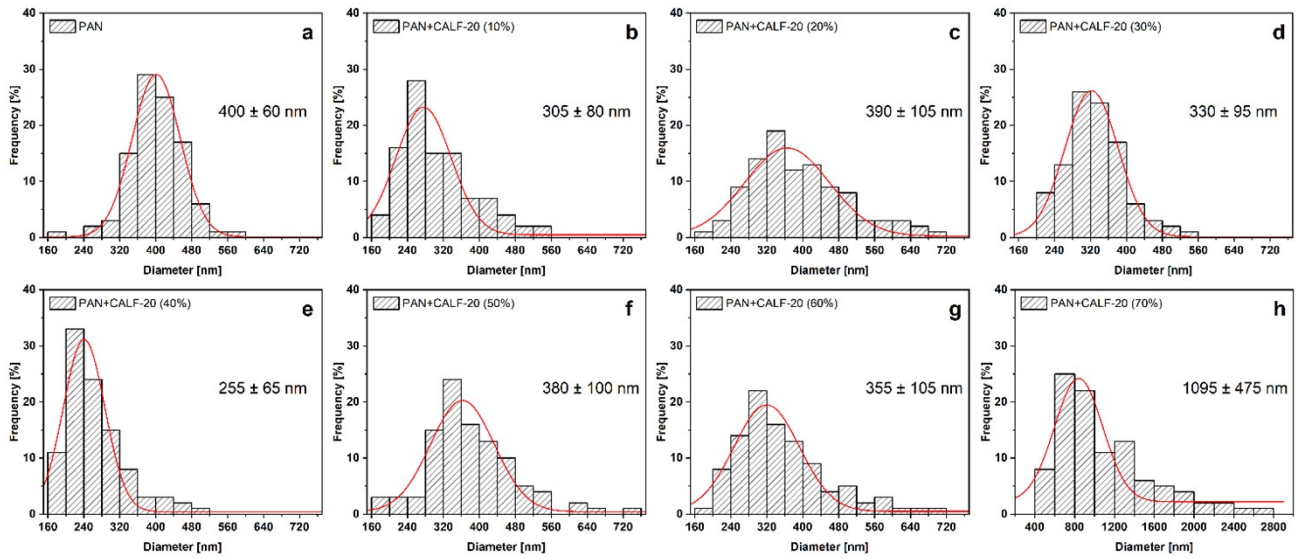

**Fig. S3** Diameter distribution of the as-spun fibers containing different loads of CALF-20.

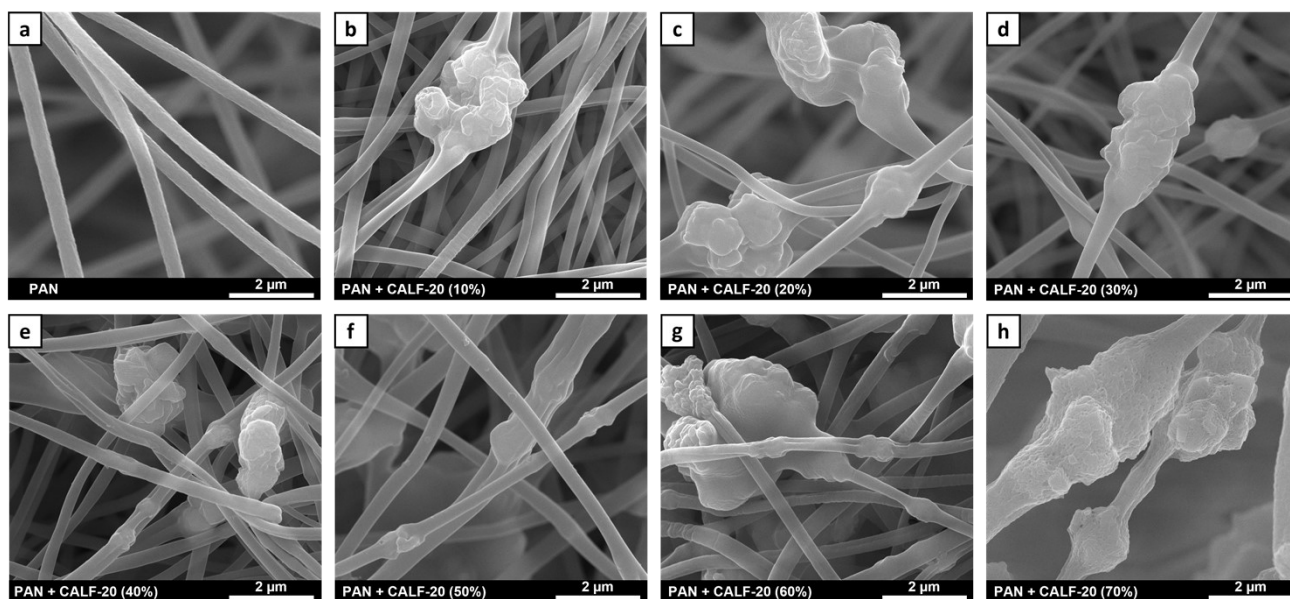

**Fig. S4** – SEM images of the electrospun mats with different CALF-20 content: (a) pure PAN, (b) 10 wt.%, (c) 20 wt.%, (d) 30 wt.%, (e) 40 wt.%, (f) 50 wt.%, (g) 60 wt.%, and (h) 70 wt.%.

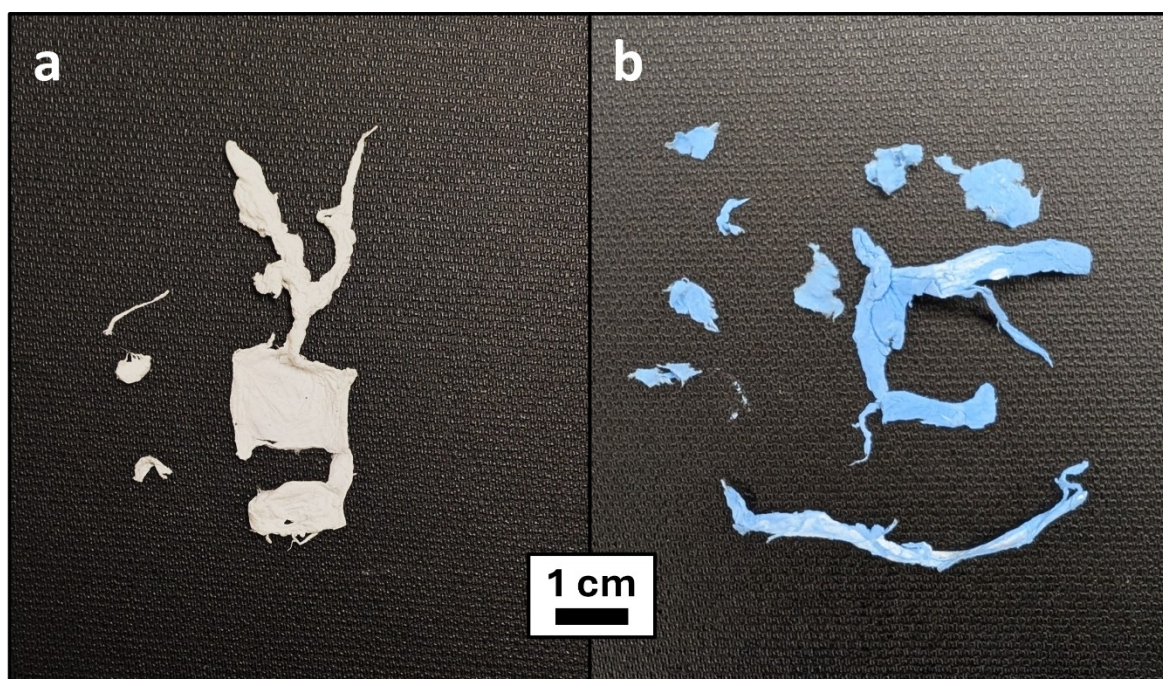

**Fig. S5** – Digital image of the PAN membrane containing 70 wt% of CALF-20 after (a) Pb and (b) Cu removal.



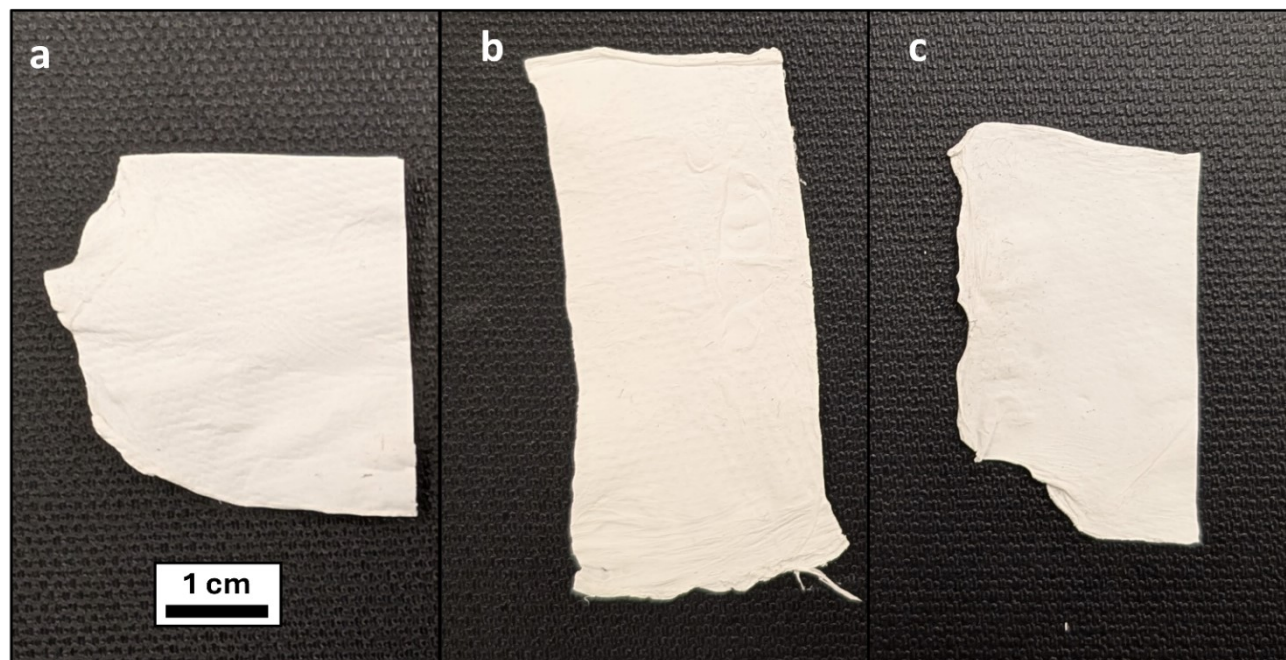

**Fig. S6** Digital image of the PAN membrane containing 60 wt% of CALF-20 (a) as-spun and after Pb removal: (b) air dried, and (c) dried at 100 °C, under vacuum.

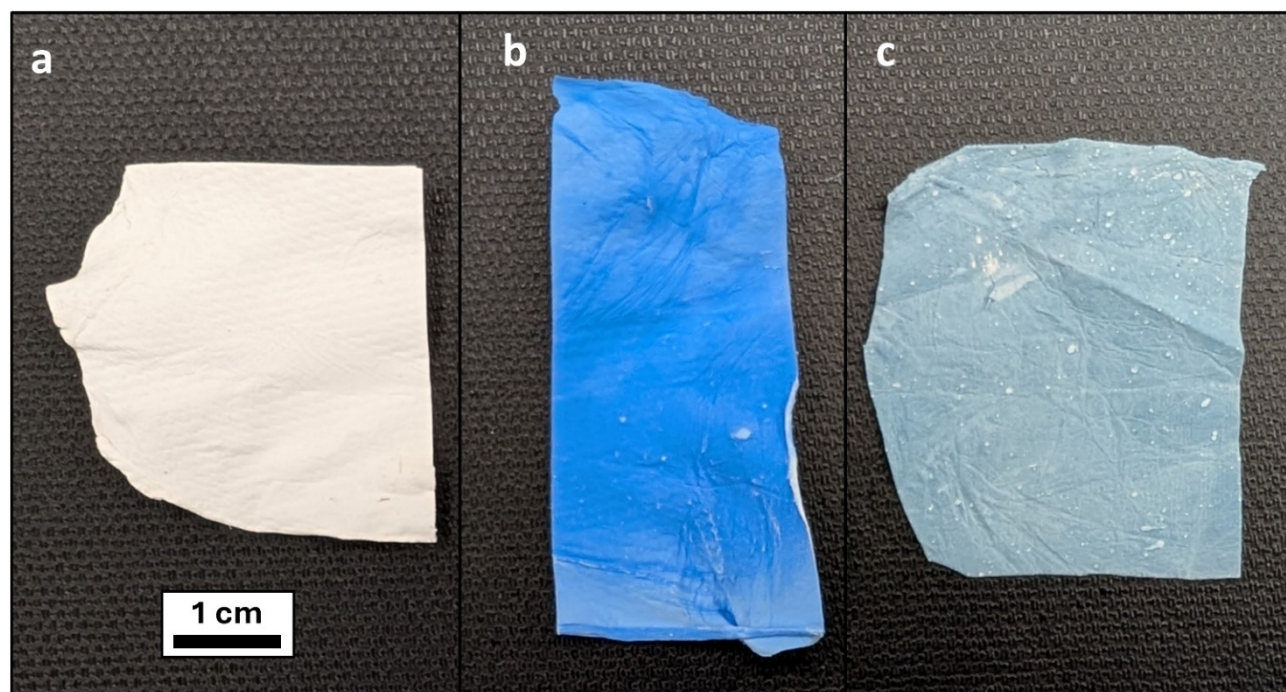

**Fig. S7** Digital image of the PAN membrane containing 60 wt% of CALF-20 (a) as-spun and after Cu removal: (b) air dried, and (c) dried at 100 °C, under vacuum.

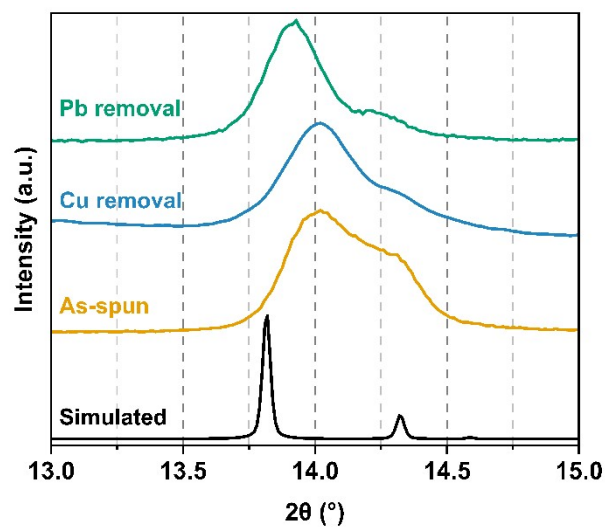

**Fig. S8** XRD pattern with  $2\theta$  from 13.0 to 15.0 of the simulated CALF-20, as-pun PAN+CALF-20 (60 wt.%) mat, and after metal removal

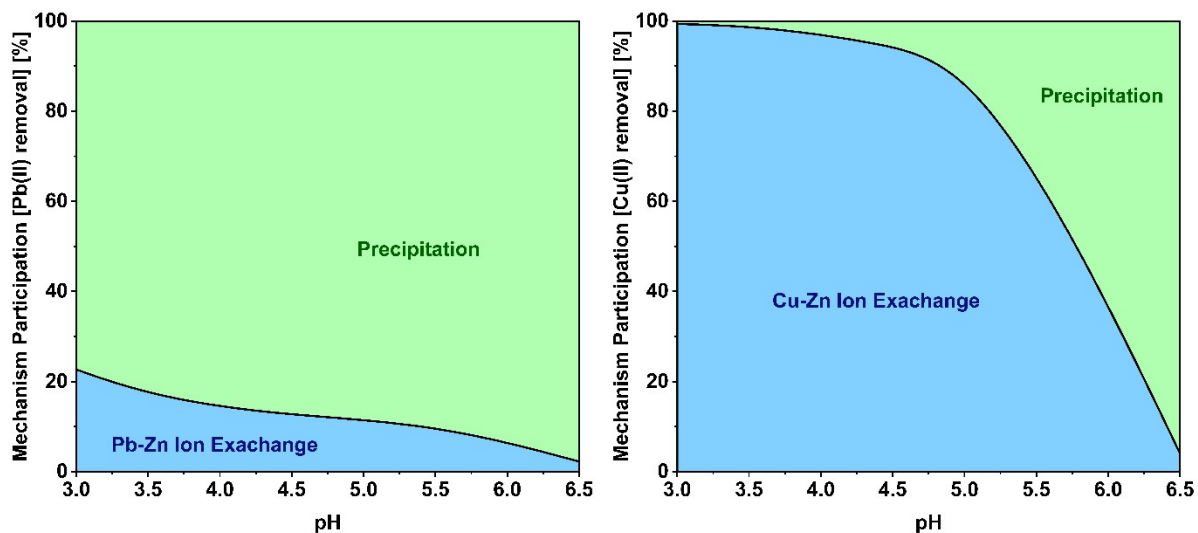

**Fig. S9** Contribution of ion exchange and precipitation mechanisms in Pb(II) and Cu(II) removal.
